# Supplementary material for: Controllable Charge Transfer in Ag-TiO2 Composite Structure for SERS Application
Source: MDPI journal article supplement (doi:10.3390/nano7070159), 2017-06-28
Supplement: s1 [file s1]

# Controllable charge transfer in Ag-TiO<sub>2</sub> composite structure for SERS application

Yaxin Wang<sup>1</sup>, Chao Yan<sup>1</sup>, Fan Zhang<sup>1</sup>, Shuang Guo<sup>1</sup>, Renxian Gao<sup>1</sup>, Lei Chen<sup>1</sup>, Yang Liu<sup>1</sup>, Yongjun Zhang<sup>1,\*</sup>, Jinghai Yang<sup>1,2</sup>

<sup>1</sup> Key Laboratory of Functional Materials Physics and Chemistry, Jilin Normal University, Ministry of Education, Siping136000, PR China;

<sup>2</sup> Key Laboratory of Excited State Physics, Changchun Institute of Optics Fine Mechanics and Physics, Chinese Academy of Sciences, Changchun130033,PR China;

\* Correspondence: E-mail: yjzhang@jlnu.edu.cn;

Academic Editor: Dr. Yuying Zhang and Dr. Wei Xie

Received: date; Accepted: date; Published: date

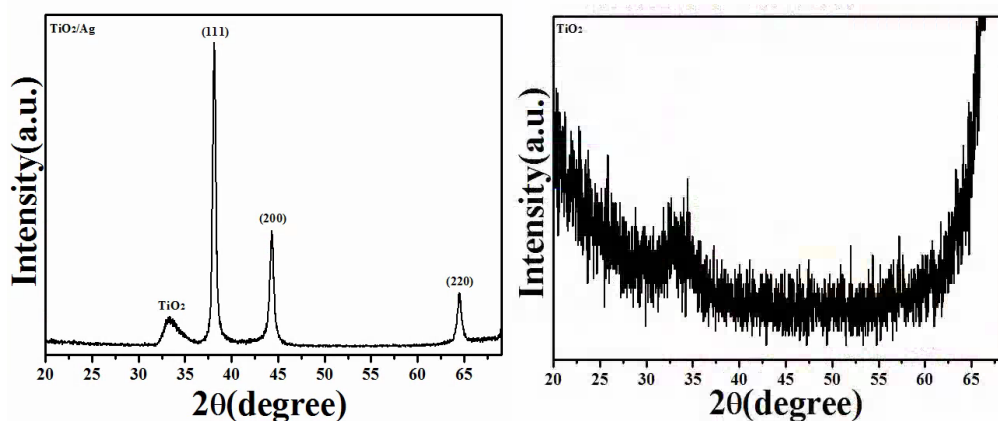

**Figure S1:** XRD pattern of TiO<sub>2</sub>/Ag bilayer and monolayer TiO<sub>2</sub> deposited on PS200 nm template

In figure S1, the diffraction peaks at 38.1°, 44.2° and 64.4° correspond to the (1 1 1), (2 0 0) and (2 2 0) lattices in Ag with face-centered cubic structure according to JCPDS card No.04-0783, respectively. However, the broadened peak about 33° indicates titanium dioxide is amorphous, which is also confirmed by the XRD pattern of amorphous TiO<sub>2</sub>.

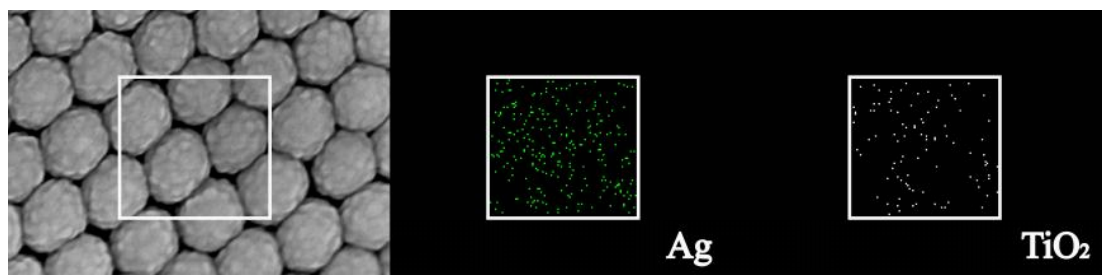

**Figure S2:** The element analysis mapping of bilayer TiO<sub>2</sub> (10 nm) /Ag (10 nm) nanocap arrays by SEM. The green and pink colors are corresponding to Ag and TiO<sub>2</sub> composition respectively

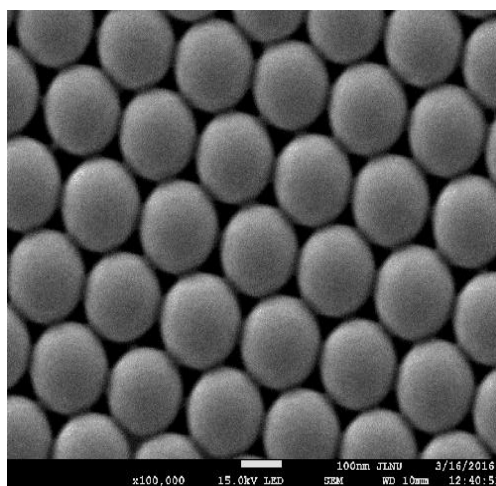

**Figure S3:** SEM of PS200 nm template
